# Supplementary material for: Proteomics Readjustment of the Yarrowia lipolytica Yeast in Response to Increased Temperature and Alkaline Stress
Source: MDPI journal article supplement (doi:10.3390/microorganisms9122619), 2021-12-18
Supplement: s1 [file s1]

**Table S2 (linked to Figure 4)**

**A:** The list of the proteins interacting with the up-regulated HSP60 heat shock protein (YALIOF02805p)

|              |                                                                                                                                                                                                                                                                                                                                                                                                                                                                                                                                                                                                                               |       |
|--------------|-------------------------------------------------------------------------------------------------------------------------------------------------------------------------------------------------------------------------------------------------------------------------------------------------------------------------------------------------------------------------------------------------------------------------------------------------------------------------------------------------------------------------------------------------------------------------------------------------------------------------------|-------|
| YALIOB05610p | <i>Uncharacterized protein; YALIOB05610p; Belongs to the GroES chaperonin family</i>                                                                                                                                                                                                                                                                                                                                                                                                                                                                                                                                          | 0.999 |
| YALIOC17347p | <i>Uncharacterized protein; YALIOC17347p; Belongs to the heat shock protein 70 family</i>                                                                                                                                                                                                                                                                                                                                                                                                                                                                                                                                     | 0.996 |
| YALIOC07953p | <i>Uncharacterized protein; YALIOC07953p</i>                                                                                                                                                                                                                                                                                                                                                                                                                                                                                                                                                                                  | 0.982 |
| KAR2         | <i>Uncharacterized protein; YALIOE13706p; Belongs to the heat shock protein 70 family</i>                                                                                                                                                                                                                                                                                                                                                                                                                                                                                                                                     | 0.964 |
| YALIOC18513p | <i>Essential component of the PAM complex, a complex required for the translocation of transit peptide-containing proteins from the inner membrane into the mitochondrial matrix in an ATP-dependent manner</i>                                                                                                                                                                                                                                                                                                                                                                                                               | 0.935 |
| ATP2         | <i>Mitochondrial membrane ATP synthase (F(1)F(0) ATP synthase or Complex V) produces ATP from ADP in the presence of a proton gradient across the membrane which is generated by electron transport complexes of the respiratory chain . F-type ATP synthases consist of two structural domains, F(1) - containing the extramembraneous catalytic core, and F(0) - containing the membrane proton channel, linked together by a central stalk and a peripheral stalk . During catalysis, ATP synthesis in the catalytic domain of F(1) is coupled via a rotary mechanism of the central stalk subunits to proton tr [...]</i> | 0.933 |
| YALIOE13255p | <i>Uncharacterized protein; YALIOE13255p; Belongs to the heat shock protein 70 family</i>                                                                                                                                                                                                                                                                                                                                                                                                                                                                                                                                     | 0.923 |
| YALIOF31207p | <i>Uncharacterized protein; YALIOF31207p</i>                                                                                                                                                                                                                                                                                                                                                                                                                                                                                                                                                                                  | 0.915 |
| YALIOE21307p | <i>Belongs to the cytochrome b5 family.</i>                                                                                                                                                                                                                                                                                                                                                                                                                                                                                                                                                                                   | 0.913 |
| YALIOE15268p | <i>Uncharacterized protein; YALIOE15268p</i>                                                                                                                                                                                                                                                                                                                                                                                                                                                                                                                                                                                  | 0.905 |

**B:** The list of the proteins interacting with the up-regulated Peptidyl-prolyl cis-trans isomerase (YALIOC10230p)

|        |                                                                                                                                                                                                                                                 |       |
|--------|-------------------------------------------------------------------------------------------------------------------------------------------------------------------------------------------------------------------------------------------------|-------|
| Q6C3C8 | <i>YALIOF00770p</i>                                                                                                                                                                                                                             | 0.917 |
| Q6CDY4 | <i>YALIOB20262p</i>                                                                                                                                                                                                                             | 0.917 |
| Q6CCW1 | <i>Histone deacetylase; Belongs to the histone deacetylase family. HD Type 1 subfamily.</i>                                                                                                                                                     | 0.913 |
| Q6C330 | <i>YALIOF03069p</i>                                                                                                                                                                                                                             | 0.912 |
| Q6C219 | <i>YALIOF11583p</i>                                                                                                                                                                                                                             | 0.814 |
| FPR1   | <i>FK506-binding protein 1; PPlases accelerate the folding of proteins. It catalyzes the cis-trans isomerization of proline imidic peptide bonds in oligopeptides (By similarity); Belongs to the FKBP-type PPIase family. FKBP1 subfamily.</i> | 0.813 |
| Q6C237 | <i>YALIOF11165p</i>                                                                                                                                                                                                                             | 0.795 |
| Q6C2D7 | <i>YALIOF08745p</i>                                                                                                                                                                                                                             | 0.784 |
| Q6C1D2 | <i>YALIOF17314p</i>                                                                                                                                                                                                                             | 0.762 |
| Q6C7S4 | <i>YALIOD25762p</i>                                                                                                                                                                                                                             |       |

**C:** The list of the proteins interacting with the up-regulated Glyceraldehyde-3-phosphate dehydrogenase (YALIOC06369p)

|              |                                                                                                                                                                                                                                               |       |
|--------------|-----------------------------------------------------------------------------------------------------------------------------------------------------------------------------------------------------------------------------------------------|-------|
|              | <i>Belongs to the triosephosphate isomerase family.</i>                                                                                                                                                                                       | 0.999 |
| YALIOE26004p | <i>Catalyzes the aldol condensation of dihydroxyacetone phosphate (DHAP or glyceralone-phosphate) with glyceraldehyde 3-phosphate (G3P) to form fructose 1,6-bisphosphate (FBP) in gluconeogenesis and the reverse reaction in glycolysis</i> | 0.999 |
| PGK1         | <i>Phosphoglycerate kinase; YALIOD12400p; Belongs to the phosphoglycerate kinase family</i>                                                                                                                                                   | 0.999 |
| ENO          | <i>Uncharacterized protein; YALIOF16819p</i>                                                                                                                                                                                                  | 0.993 |
| YALIOF07711p | <i>Glucose-6-phosphate isomerase; YALIOF07711p; Belongs to the GPI family</i>                                                                                                                                                                 | 0.991 |
| YALIOF15587p | <i>Transaldolase is important for the balance of metabolites in the pentose-phosphate pathway</i>                                                                                                                                             | 0.983 |
| YALIOE22649p | <i>Catalyzes the rate-limiting step of the oxidative pentose- phosphate pathway, which represents a route for the dissimulation of carbohydrates besides glycolysis</i>                                                                       | 0.979 |
| YALIOF01584p | <i>Triosephosphate isomerase; YALIOF01584p</i>                                                                                                                                                                                                | 0.976 |
| YALIOE06479p | <i>Catalyzes the transfer of a two-carbon ketol group from a ketose donor to an aldose acceptor, via a covalent intermediate with the cofactor thiamine pyrophosphate</i>                                                                     | 0.969 |
| YALIOD02277p | <i>Uncharacterized protein; YALIOD02277p</i>                                                                                                                                                                                                  | 0.964 |

**D:** The list of the proteins interacting with the up-regulated Triosephosphate isomerase(YALIOF05214p)

|        |                                                                                                                                                                                                                                                                                                                                               |       |
|--------|-----------------------------------------------------------------------------------------------------------------------------------------------------------------------------------------------------------------------------------------------------------------------------------------------------------------------------------------------|-------|
| Q6C2I1 | <i>Glucose-6-phosphate isomerase; Belongs to the GPI family.</i>                                                                                                                                                                                                                                                                              | 0.999 |
| Q6C1K2 | <i>Transaldolase; Transaldolase is important for the balance of metabolites in the pentose-phosphate pathway.</i>                                                                                                                                                                                                                             | 0.998 |
| GPD    | <i>Glyceraldehyde-3-phosphate dehydrogenase; Belongs to the glyceraldehyde-3-phosphate dehydrogenase family.</i>                                                                                                                                                                                                                              | 0.998 |
| Q6CFX7 | <i>Phosphoglycerate mutase; Belongs to the phosphoglycerate mutase family. BPG- dependent PGAM subfamily.</i>                                                                                                                                                                                                                                 | 0.997 |
| Q6C4K5 | <i>Fructose-bisphosphate aldolase; Catalyzes the aldol condensation of dihydroxyacetone phosphate (DHAP or glyceralone-phosphate) with glyceraldehyde 3-phosphate (G3P) to form fructose 1,6-bisphosphate (FBP) in gluconeogenesis and the reverse reaction in glycolysis; Belongs to the class II fructose-bisphosphate aldolase family.</i> | 0.996 |
| Q6C395 | <i>Triosephosphate isomerase</i>                                                                                                                                                                                                                                                                                                              | 0.993 |
| ENO    | <i>Enolase</i>                                                                                                                                                                                                                                                                                                                                | 0.990 |
| PGK1   | <i>Phosphoglycerate kinase; Belongs to the phosphoglycerate kinase family.</i>                                                                                                                                                                                                                                                                | 0.988 |
| Q6C6T4 | <i>Transketolase; Catalyzes the transfer of a two-carbon ketol group from a ketose donor to an aldose acceptor, via a covalent intermediate with the cofactor thiamine pyrophosphate.</i>                                                                                                                                                     | 0.988 |
| Q6C394 | <i>YALIOF01606p</i>                                                                                                                                                                                                                                                                                                                           | 0.976 |

**E:** The list of the up-regulated proteins interacting with VDAC (YAL10F17314p)

|              |                                                                                                                                                                                                                                                                                                                                                                                                                                                                                                                                                                                                                               |       |
|--------------|-------------------------------------------------------------------------------------------------------------------------------------------------------------------------------------------------------------------------------------------------------------------------------------------------------------------------------------------------------------------------------------------------------------------------------------------------------------------------------------------------------------------------------------------------------------------------------------------------------------------------------|-------|
| YALI0F31207p | <i>Uncharacterized protein; YALI0F31207p</i>                                                                                                                                                                                                                                                                                                                                                                                                                                                                                                                                                                                  | 0.964 |
| YALI0B10362p | <i>Uncharacterized protein; YALI0B10362p</i>                                                                                                                                                                                                                                                                                                                                                                                                                                                                                                                                                                                  | 0.954 |
| YALI0A07084p | <i>Uncharacterized protein; YALI0A07084p</i>                                                                                                                                                                                                                                                                                                                                                                                                                                                                                                                                                                                  | 0.954 |
| GEM1         | <i>Mitochondrial GTPase involved in mitochondrial trafficking. Probably involved in control of anterograde transport of mitochondria and their subcellular distribution</i>                                                                                                                                                                                                                                                                                                                                                                                                                                                   | 0.945 |
| QCR2         | <i>Uncharacterized protein; YALI0F08613p; Belongs to the peptidase M16 family</i>                                                                                                                                                                                                                                                                                                                                                                                                                                                                                                                                             | 0.910 |
| YALI0F08899p | <i>Uncharacterized protein; YALI0F08899p; Belongs to the TRAFAC class dynamin-like GTPase superfamily. Dynamin/Fzo/YdjA family</i>                                                                                                                                                                                                                                                                                                                                                                                                                                                                                            | 0.893 |
| ATP1         | <i>Mitochondrial membrane ATP synthase (F(1)F(0) ATP synthase or Complex V) produces ATP from ADP in the presence of a proton gradient across the membrane which is generated by electron transport complexes of the respiratory chain . F-type ATP synthases consist of two structural domains, F(1) - containing the extramembraneous catalytic core, and F(0) - containing the membrane proton channel, linked together by a central stalk and a peripheral stalk . During catalysis, ATP synthesis in the catalytic domain of F(1) is coupled via a rotary mechanism of the central stalk subunits to proton tr [...]</i> | 0.892 |
| YALI0C11011p | <i>Uncharacterized protein; YALI0C11011p</i>                                                                                                                                                                                                                                                                                                                                                                                                                                                                                                                                                                                  | 0.888 |
| MDM10        | <i>Component of the ERMES/MDM complex, which serves as a molecular tether to connect the endoplasmic reticulum and mitochondria. Components of this complex are involved in the control of mitochondrial shape and protein biogenesis and may function in phospholipid exchange. MDM10 is involved in the late assembly steps of the general translocase of the mitochondrial outer membrane (TOM complex). Functions in the TOM40-specific route of the assembly of outer membrane beta-barrel proteins, including the association of TOM40 with the receptor TOM22 and small TOM proteins. Can associate with the [...]</i> | 0.864 |
| YALI0F03567p | <i>Uncharacterized protein; YALI0F03567p</i>                                                                                                                                                                                                                                                                                                                                                                                                                                                                                                                                                                                  | 0.835 |

**F:** The list of the up-regulated proteins interacting with malate dehydrogenase (YAL10D16753p)

|              |                                                                                                                                                                                                     |       |
|--------------|-----------------------------------------------------------------------------------------------------------------------------------------------------------------------------------------------------|-------|
| YALI0E02684p | <i>Citrate synthase; YALI0E02684p; Belongs to the citrate synthase family</i>                                                                                                                       | 0.999 |
| YALI0C06776p | <i>Uncharacterized protein; YALI0C06776p</i>                                                                                                                                                        | 0.999 |
| YALI0B02178p | <i>Aspartate aminotransferase; YALI0B02178p</i>                                                                                                                                                     | 0.998 |
| YALI0F29337p | <i>Aspartate aminotransferase; YALI0F29337p</i>                                                                                                                                                     | 0.996 |
| YALI0E00638p | <i>Citrate synthase; YALI0E00638p; Belongs to the citrate synthase family</i>                                                                                                                       | 0.996 |
| YALI0E18634p | <i>Uncharacterized protein; YALI0E18634p</i>                                                                                                                                                        | 0.987 |
| YALI0C16995p | <i>Uncharacterized protein; YALI0C16995p</i>                                                                                                                                                        | 0.987 |
| YALI0C24101p | <i>Catalyzes a 2-step reaction, involving the ATP-dependent carboxylation of the covalently attached biotin in the first step and the transfer of the carboxyl group to pyruvate in the second.</i> | 0.980 |
| YALI0E15708p | <i>Malate synthase; YALI0E15708p; Belongs to the malate synthase family</i>                                                                                                                         | 0.977 |
| YALI0D19140p | <i>Malate synthase; YALI0D19140p; Belongs to the malate synthase family</i>                                                                                                                         | 0.977 |
