# Supplementary material for: Proteomics Readjustment of the Yarrowia lipolytica Yeast in Response to Increased Temperature and Alkaline Stress
Source: MDPI journal article supplement (doi:10.3390/microorganisms9122619), 2021-12-18
Supplement: s1 [file s1]

**Table S3 (linked to Figure 5)****A: The list of the induced proteins interacting with SSA4 heat shock protein of HSP70 family**

|        |                                                                                                                                                            |       |
|--------|------------------------------------------------------------------------------------------------------------------------------------------------------------|-------|
| Q6C3C3 | <i>YALI0F00880p</i>                                                                                                                                        | 0.989 |
| Q6C618 | <i>YALI0E13255p</i>                                                                                                                                        | 0.988 |
| Q6CCI8 | <i>YALI0C08987p</i>                                                                                                                                        | 0.983 |
| Q6CCN4 | <i>YALI0C07953p</i>                                                                                                                                        | 0.975 |
| Q6CI89 | <i>YALI0A00594p</i>                                                                                                                                        | 0.970 |
| Q6CEW3 | <i>YALI0B12408p</i>                                                                                                                                        | 0.969 |
| Q6CGR2 | <i>Clathrin heavy chain; Clathrin is the major protein of the polyhedral coat of coated pits and vesicles; Belongs to the clathrin heavy chain family.</i> | 0.964 |
| Q6C608 | <i>YALI0E13508p</i>                                                                                                                                        | 0.958 |
| Q6CAS1 | <i>YALI0D00429p</i>                                                                                                                                        | 0.958 |
| Q6C4W1 | <i>YALI0E23265p</i>                                                                                                                                        | 0.949 |

**B: The list of the induced proteins interacting with Thioredoxin (CPAR2\_200490)**

|        |                                                                                                                                                                                                    |       |
|--------|----------------------------------------------------------------------------------------------------------------------------------------------------------------------------------------------------|-------|
| G8B9M8 | <i>Thioredoxin reductase</i>                                                                                                                                                                       | 0.999 |
| G8BJ65 | <i>Thioredoxin domain-containing protein</i>                                                                                                                                                       | 0.999 |
| G8BEE7 | <i>PMSR domain-containing protein</i>                                                                                                                                                              | 0.990 |
| G8BHL6 | <i>Glutathione reductase; Maintains high levels of reduced glutathione in the cytosol. ; Belongs to the class-I pyridine nucleotide-disulfide oxidoreductase family.</i>                           | 0.986 |
| G8BE75 | <i>Uncharacterized protein</i>                                                                                                                                                                     | 0.983 |
| G8BDM1 | <i>Sulfiredoxin</i>                                                                                                                                                                                | 0.972 |
| G8BH83 | <i>Superoxide dismutase [Cu-Zn]; Destroys radicals which are normally produced within the cells and which are toxic to biological systems. ; Belongs to the Cu-Zn superoxide dismutase family.</i> | 0.964 |
| G8BH89 | <i>Superoxide dismutase [Cu-Zn]; Destroys radicals which are normally produced within the cells and which are toxic to biological systems. ; Belongs to the Cu-Zn superoxide dismutase family.</i> | 0.964 |
| G8B642 | <i>Peptide-methionine (R)-S-oxide reductase; Belongs to the MsrB Met sulfoxide reductase family.</i>                                                                                               | 0.959 |
| G8BJ84 | <i>BZIP domain-containing protein</i>                                                                                                                                                              | 0.951 |
