# Supplementary material for: Proteomics Readjustment of the Yarrowia lipolytica Yeast in Response to Increased Temperature and Alkaline Stress
Source: Microorganisms. 2021 Dec 18;9(12):2619. doi: 10.3390/microorganisms9122619 (PMC8708323; doi:10.3390/microorganisms9122619)
Supplement: Supplementary file 1 [file microorganisms-09-02619-s001.zip]

Archive with 4 entries (4 files):
- Figures S1-S4.pdf
- Table S1.xlsx
- Table S2.pdf
- Table S3.pdf
