# Supplementary material for: Proteomics Readjustment of the Yarrowia lipolytica Yeast in Response to Increased Temperature and Alkaline Stress
Source: Microorganisms. 2021 Dec 18;9(12):2619. doi: 10.3390/microorganisms9122619 (PMC8708323; doi:10.3390/microorganisms9122619)
Supplement: Supplementary file 1 [file microorganisms-09-02619-s001.zip › Table S1.xlsx]

## Sheet: Лист1
ID	gel_ID	condition	M_exp	Pi_exp	M_predict	Pi_predict	Score	Name	function	ref	localisation	Pathway	host	comment
1	4/716	Optimal	27	8	29.6	8.8	303	YALI0F17314p	VDAC	PMID_15229592.	mth	mitochondrial transport	Yarrowia lipolytica
2	4/716	Optimal	30	7	35.8	8.5	554	YALI0D16753p	Malate dehydrogenase	PMID_15229592.	mth	TAC	Yarrowia lipolytica
3	4/716	Optimal	32	7	35.8	6.6	227	YALI0C06369p	Glyceraldehyde-3-phosphate dehydrogenase	PMID_15229592.	Ctp	glycolysis	Yarrowia lipolytica
4	4/716	Optimal	33	4	34.1	4.5	154	YALI0B03564p	1,3-beta-glucanosyltransferase activity	PMID_15229592.	CW/ex	carbohydrate metabolism/cell wall	Yarrowia lipolytica
5	4/716	Optimal	50	4	29.7	4.2	169	YALI0B20306p	cell wall mannoprotein (Pir1)	PMID_15229592.	CW	cell wall	Yarrowia lipolytica
6	4/716	Optimal	60	5.6	60.5	6.6	233	YALI0F02805p	HSP60 heat shock protein - chaperone	PMID_15229592.	mth	folding	Yarrowia lipolytica
7	4/716	Optimal	21	4.2	70.4	4.6	96	YALI0F25289p	HSP70 heat shock protein	PMID_15229592.	Ctp/Nuc/PM	folding	Yarrowia lipolytica	fragment
8	4/716	Optimal	21	4.8	18.6	4.9	196	YALI0F27049p	Tropomyosin	PMID_15229592.	CS	cytoskeleton	Yarrowia lipolytica
9	4/716	Optimal	16	4	14.8	4.4	97	YALI0D22022p	ATP synthase subunit delta	PMID_15229592.	mth	OxPhos	Yarrowia lipolytica
10	4/716	Optimal	12	4.5	58	4.8	149	YALI0F03179p	ATP synthase subunit alpha	PMID_15229592.	mth	OxPhos	Yarrowia lipolytica	mixture/fragment
10	4/716	Optimal	12	4.5	17	4.8	90	YALI0E10144p	cytochrome-c oxidase subunit VI	PMID_15229592.	mth	OxPhos	Yarrowia lipolytica	mixture
11	4/716	Optimal	10	4.2	11.5	4.6	181	YALI0F01496p	Thioredoxin	PMID_15229592.	Ctp	RedOx	Yarrowia lipolytica
12	4/716	Optimal	15	5	17.6	5.2	103	YALI0E19723p	cytochrome-c oxidase chain IV	PMID_15229592.	mth	OxPhos	Yarrowia lipolytica
13	4/716	Optimal	9	5.8	13.4	5.7	108	YALI0B07183p	Profilin	PMID_15229592.	CS	cytoskeleton	Yarrowia lipolytica	mixture
13	4/716	Optimal	9	5.8	15.4	5.7	77	A0A1H6Q0M6	40S ribosomal protein S14	Walker_at_al	Rbs	translation	Yarrowia lipolytica	mixture
14	4/716	Optimal	11	6.1	11.6	6	215	YALI0B10450p	Peptidyl-prolyl cis-trans isomerase	PMID_15229592.	Ctp	folding	Yarrowia lipolytica
15	4/716	Optimal	9	7	14.8	9.8	384	ubiquitin-60S ribosomal protein L40 fusion protein	Ubiquitin	PMID_15229592.	Nuc/Ctp	translation/ubiquitination	Yarrowia lipolytica
16	9/696	Optimal	16	5.9	17.2	6.8	76	YALI0F09229p	Nucleoside diphosphate kinase	PMID_15229592.		nucleotide sinthesis	Yarrowia lipolytica	mixture
16	4/716	Optimal	15	6.7	15.9	5.9	152	YALI0E12133p	Superoxide dismutase [Cu-Zn]	PMID_15229592.	Ctp	RedOx	Yarrowia lipolytica	mixture
16	4/716	Optimal	15	7	17.8	6.9	179	YALI0C10230p	Peptidyl-prolyl cis-trans isomerase	PMID_15229592.	Ctp	folding	Yarrowia lipolytica	mixture
18	4/716	Optimal	23	6.5	26.7	6.3	190	YALI0F05214p	Triosephosphate isomerase	PMID_15229592.	Ctp	glycolysis	Yarrowia lipolytica
19	4/716	Optimal	23	6.7	24.6	5.9	118	YALI0A19426p	Thiol-specific peroxidase	PMID_15229592.	Ctp/mth	RedOx	Yarrowia lipolytica
20	9/696	Alcaline	27	8	29.6	8.8	303	YALI0F17314p	VDAC	PMID_15229592.	mth	itochondrial transport	Yarrowia lipolytica
21	9/696	Alcaline	30	7	35.8	8.5	554	YALI0D16753p	Malate dehydrogenase	PMID_15229592.	mth/Ctp	TAC	Yarrowia lipolytica
22	9/696	Alcaline	32	7	35.8	6.6	227	YALI0C06369p	Glyceraldehyde-3-phosphate dehydrogenase	PMID_15229592.	Ctp	glycolysis	Yarrowia lipolytica
23	9/696	Alcaline	33	4	34.1	4.5	154	YALI0B03564p	1,3-beta-glucanosyltransferase activity	PMID_15229592.	CW/ex	carbohydrate metabolism/cell wall	Yarrowia lipolytica
24	9/696	Alcaline	30	4	31	4.4	79	YALI0B09339p	endopeptidase activator activity	PMID_15229592.	Nuc/Ctp	ubiquitination	Yarrowia lipolytica	mixture
24	9/696	Alcaline	32	4	70.2	4.9	70	YALI0D08184p	SSA4 heat shock protein of HSP70 family	https://pubmed.ncbi.nlm.nih.gov/15229592/	Ctp/Nuc/PM	folding	Yarrowia lipolytica	в составе смеси/фрагмент
25	9/696	Alcaline	60	6	57	6.6	178	YALI0D00451p	uncharacterized protein	PMID_15229592.			Yarrowia lipolytica
26	9/696	Alcaline	50	5.5	60.5	6.6	532	YALI0F02805p	HSP60 heat shock protein - chaperone	PMID_15229592.	mth	folding	Yarrowia lipolytica	fragment
27	9/696	Alcaline	21	4.8	18.6	4.9	300	YALI0F27049p	Tropomyosin	PMID_15229592.	CS		Yarrowia lipolytica	mixture
27	9/696	Alcaline	21	4.8	70.2	4.9	115	YALI0D08184p	SSA4 heat shock protein of HSP70 family	PMID_15229592.	Ctp/Nuc/PM	folding	Yarrowia lipolytica	mixture/fragment
27	9/696	Alcaline	21	4.8	21.8	5.9	81	YALI0B07007p	NAD(P)H dehydrogenase (quinone) activity	PMID_15229592.		RedOx	Yarrowia lipolytica	mixture
28	9/696	Alcaline	20	4.5	14.6	4.61	111	YALI0F08327p	uncharacterized protein	PMID_15229592.			Yarrowia lipolytica
29	9/696	Alcaline	16	4	18.4	5.9	81	YALI0A10879p	E3 ubiquitin ligase complex SCF subunit	PMID_15229592.	Nuc/Ctp	ubiquitination	Yarrowia lipolytica	mixture
29	9/696	Alcaline	16	4	14.8	4.4	79	YALI0D22022p	ATP synthase subunit delta	PMID_15229592.	mth	OxPhos	Yarrowia lipolytica	mixture
30	9/696	Alcaline	15	4.8	18.7	5.3	163	YALI0E32736p	Bis(5'-adenosyl)-triphosphatase	PMID_15229592.			Yarrowia lipolytica	mixture/fragment
30	9/696	Alcaline	15	5	17.6	5.2	116	YALI0E19723p	cytochrome-c oxidase chain IV	PMID_15229592.	mth	OxPhos	Yarrowia lipolytica	mixture
31	9/696	Alcaline	12	4.5	16.1	4.8	162	YALI0E03388p	Myosin regulatory light chain cdc4/Calcium binding	PMID_15229592.	CS		Yarrowia lipolytica	mixture
31	9/696	Alcaline	12	4.5	17	4.8	90	YALI0E10144p	cytochrome-c oxidase subunit VI	PMID_15229592.	mth	OxPhos	Yarrowia lipolytica	mixture
32	9/696	Alcaline	10	4.2	11.5	4.6	162	YALI0F01496p	Thioredoxin	PMID_15229592.	Ctp	RedOx	Yarrowia lipolytica
33	9/696	Alcaline	9	5.8	15.4	5.7	287	A0A1H6Q0M6	40S ribosomal protein S14	Walker_at_al	Cts	translation	Yarrowia lipolytica
34	9/696	Alcaline	11	5.8	13	5.2	193	YALI0A10747p	uncharacterized protein	PMID_15229592.			Yarrowia lipolytica
35	9/696	Alcaline	16	5.9	17.2	5.6	135	YALI0C03443p	small heat shock protein (HSP20) family	PMID_15229592.		folding/stress resistance	Yarrowia lipolytica	mixture
35	9/696	Alcaline	16	5.9	17.2	6.3	76	YALI0F09229p	Nucleoside diphosphate kinase	PMID_15229592.		nucleotide sinthesis	Yarrowia lipolytica	mixture
36	9/696	Alcaline	17	6.5	17.3	5.5	279	YALI0F08393p	Nascent polypeptide-associated complex subunit beta	PMID_15229592.	Nuc/Ctp	folding	Yarrowia lipolytica
37	9/696	Alcaline	9	7	14.8	9.8	384	ubiquitin-60S ribosomal protein L40 fusion protein	Ubiquitin	PMID_15229592.	Nuc/Ctp	translation/ubiquitination	Yarrowia lipolytica
38	9/696	Alcaline	15	6.7	15.9	5.9	200	YALI0E12133p	Superoxide dismutase [Cu-Zn]	PMID_15229592.	Ctp	RedOx	Yarrowia lipolytica	mixture
38	9/696	Alcaline	15	6.7	17.8	6.9	108	YALI0C10230p	Peptidyl-prolyl cis-trans isomerase	PMID_15229592.		folding	Yarrowia lipolytica	mixture
39	9/696	Alcaline	15	6.7	17.8	6.9	176	YALI0C10230p	Peptidyl-prolyl cis-trans isomerase	PMID_15229592.		folding	Yarrowia lipolytica
40	9/696	Alcaline	23	6.5	26.7	6.3	401	YALI0F05214p	Triosephosphate isomerase	PMID_15229592.	Ctp	glycolysis	Yarrowia lipolytica
41	9/696	Alcaline	23	6.5	70	5.4	148	YALI0C17347p	SSC1 Heat shock protein	PMID_15229592.	mth/Ctp	folding/stress resistance	Yarrowia lipolytica	var/fragment
42	9/794	Heat_stress	34	5	70.1	5.1	112	YALI0D22352p	SSA4 heat shock protein	PMID_15229592.	Nuc/Ctp	folding/stress resistance	Yarrowia lipolytica	fragment
43	9/794	Heat_stress	36	5	61.2	5	141	CPAR2_700380	heat shock protein 70 family	Guida_at_al	Ctp	folding/stress resistance	Candida parapsilosis	fragment/mixture
43	9/794	Heat_stress	36	5	33.4	5.2	129	CPAR2_106080	Mitochondrial import inner membrane translocase TIM40	Guida_at_al	mth	mitochondrial transport	Candida parapsilosis	mixture
44	9/794	Heat_stress	23	4.5	70.1	5	84	YALI0E35046p	SSA4 heat shock protein of	PMID_15229592.	Ctp/Nuc/PM	folding/stress resistance	Yarrowia lipolytica	fragment
45	9/794	Heat_stress	18	5	17.02	5.3	83	YALI0F20856p	Cofilin	PMID_15229592.	Nuc/Ctp/CS	cell circle/division	Yarrowia lipolytica
46	9/794	Heat_stress	17	5	15.0	5.7	95	CPAR2_203450	Formate dehydrogenase	Guida_at_al		formate catabolic process	Candida parapsilosis
47	9/794	Heat_stress	17	8	39.8	5.4	147	CPAR2_401230	Fructose-bisphosphate aldolase	Guida_at_al	mth/Ctp	glycolysis	Candida parapsilosis	fragment
48	9/794	Heat_stress	23	8.7	27.4	8.5	148	Q0ZIC1_CANPA	GTPase cytoplasmic elongation factor 1 alpha	Guida_at_al	Ctp	translation	Candida parapsilosis
49	9/794	Heat_stress	20	4	56.4	6.5	250	CPAR2_802980	uncharacterized protein	Guida_at_al			Candida parapsilosis	fragment
50	10/794	Heat_stress	20	4	40.3	6.5	86	YALI0B22506p	Formate dehydrogenase	PMID_15229592.		formate catabolic process	Yarrowia lipolytica	var/fragments of same prot with different Pi
51	10/794	Heat_stress	20	5.3	40.3	6.5	86	YALI0B22506p	Formate dehydrogenase	PMID_15229592.		formate catabolic process	Yarrowia lipolytica	var/fragments of same prot with different Pi
52	10/794	Heat_stress	11	6.5	11.3	5.3	172	CPAR2_200490	Thioredoxin	Guida_at_al		RedOx	Candida parapsilosis
53	10/794	Heat_stress	23	6.2	70.5	5.1	173	YALI0D22352p	SSA4 heat shock protein of HSP70 family	PMID_15229592.	Nuc/Ctp	folding/stress resistance	Yarrowia lipolytica	var/fragment
54	10/794	Heat_stress	16	6.5	16.2	5.4	201	CPAR2_500390	Superoxide dismutase [Cu-Zn]	Guida,A., Lindstaedt,C., Maguire,S.L., Ding,C., Higgins,D.G., Harris,D., Berriman,M. and Butler,G. Transcriptional landscape of the pathogenic yeast Candida parapsilosis. Unpublished	Ctp	RedOx	Candida parapsilosis
55		Combined_stress	20	9.5	23.1	9.7	182	CPAR2_503440	ATP synthase subunit 5	Guida_at_al	mth	OxPhos	Candida parapsilosis
56	9/388	Combined_stress	14	8.7	37.1	6.3	92	CPCR1	Carbonyl reductase	Guida_at_al			Candida parapsilosis
57	9/389	Combined_stress	14	8.5	50	9.1	125	CPAR2_207060	Elongation factor 1-alpha	Guida_at_al		translation	Candida parapsilosis	fragment
58	9/390	Combined_stress	12	8.7	37.1	6.3	99	CPCR1	Carbonyl reductase	Guida_at_al			Candida parapsilosis	fragment or subunit
59	9/391	Combined_stress	12	8.7	43	8.6	94	CPAR2_502580	Carbonyl reductase	Guida_at_al			Candida parapsilosis	fragment
60	9/394	Combined_stress	13	6.5	36.1	6.2	114	CPAR2_808670	Glyceraldehyde-3-phosphate dehydrogenase	Guida_at_al	Ctp	glycolysis	Candida parapsilosis	var
61	9/395	Combined_stress	16	6.9	16	5.4	148	CPAR2_500390	Superoxide dismutase [Cu-Zn]	Guida_at_al	Ctp	RedOx	Candida parapsilosis	fragment
62	9/396	Combined_stress	13	5.3	12.5	4.8	82	CPAR2_406210	SBDS domain-containing protein	Guida_at_al		ribosome biogenesis	Candida parapsilosis
63	9/397	Combined_stress	30	5	61	5	146	CPAR2_700380	heat shock protein 70 family	Guida_at_al	Ctp	folding/stress resistance	Candida parapsilosis
64	9/398	Combined_stress	30	4.7	61	5	92	CPAR2_700380	heat shock protein 70 family	Guida_at_al	Ctp	folding/stress resistance	Candida parapsilosis	fragment
65	9/399	Combined_stress	40	5	42.1	5	142	CPAR2_402950	Pyruvate dehydrogenase E1 component subunit beta	Guida_at_al			Candida parapsilosis	fragment
66	9/400	Combined_stress	23	5	22.7	5.7	132	HSP70 chaperone	heat shock protein 70 family	PMID_22563397	Ctp	folding/stress resistance	Candida orthopsilosis
